# Supplementary material for: Structural insights into the activation and inhibition of CXC chemokine receptor 3
Source: PubMed Central journal article supplement (PMC11026165; doi:10.1038/s41594-023-01175-5), 2024-01-04
Supplement: 41594_2023_1175_MOESM1_ESM.pdf [file 41594_2023_1175_MOESM1_ESM.pdf]

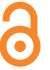

---

# Structural insights into the activation and inhibition of CXC chemokine receptor 3

---

In the format provided by the authors and unedited

**Supplementary Table 1. Sequence of synthesized CXCR3 and CXCL11 genes used for protein expression in *Sf9* cells.**

---

**Bril-CXCR3-LgBit (in pFastBac1)**

---

ATGAAGACTATCATCGCTCTGTCCTACATCTTCTGCCTGGTGTTCGCTGACTACAAGGACGATGAC  
GACAAGGGTTCCGCTGACCTGGAGGACAACCTGGGAGACTCTGAACGACAACCTGAAGGTGATCGA  
GAAGGCTGACAACGCTGCTCAAGTGAAGGACGCTCTGACTAAGATGAGAGCTGCCGCTCTGGACG  
CTCAGAAGGCTACTCCACCAAAGCTGGAGGACAAGTCCCCTGACTCCCCTGAGATGAAGGACTTC  
AGACACGGTTTTCGACATCCTGGTGGGTGAGATCGACGACGCTCTGAAGCTGGCTAACGAGGGTAA  
GGTGAAGGAGGCTCAAGCTGCTGCCGAGCAGTTGAAGACTACTAGAAACGCTTACATTCAGAAGTA  
CCTGCTGGTGCCAAGAGGTTCCATGGTGCTGGAGGTGTCCGACCACCAAGTGTGAACGACGCTG  
AGGTGGCTGCTCTGCTGGAGAACTTCTCCTCTTCTACGACTACGGTGAGAACGAGTCCGACTCCT  
GCTGCACTTCCCCACCATGCCACAAGACTTCTCCTGAACTTCGACAGAGCTTTCTGCCTGCTC  
TGTA CTCCCTGCTGTTCTGCTGGGTCTGCTGGGTAACGGTGTGTGGCTGCTGTGCTGCTGTCTA  
GAAGAACTGCTCTGTCCTCCACTGACACTTTCTGCTGCACCTGGCTGTGGCTGACACTCTGCTGG  
TGCTGACTCTGCCACTGTGGGCTGTGGACGCTGCTGTGCAGTGGGTGTTCCGGTCCGGTCTGTGC  
AAGGTGGCTGGTGCTTTGTTCAACATCAACTTCTACGCTGGTGTCTGTTGCTGGCTTGCATCTCCT  
TCGACAGATACCTGAACATCGTGCACGCTACTCAGCTGTACAGAAGAGGTCCACCTGCTAGAGTGA  
CTCTGACTTGCCTGGCTGTGTGGGGTCTGTGCCTGCTGTTCCGCTCTGCCTGACTTCATCTTCTGT  
CCGCTCACCACGACGAGAGACTGAACGCTACTCACTGTGAGTACAACCTCCCACAAGTGGGTCGC  
ACTGCTCTGAGAGTGCTGCAGCTGGTGGCTGGTTCTGCTGCCACTGCTGGTGATGGCTTACTG  
CTACGCTCACATCCTGGCTGTGTTGCTGGTCTCTAGAGGTCAGAGAAGACTGAGAGCTATGAGACT  
GGTGGTTCGTGGTTCGTGGTGGCTTTTGTCTGTGCTGGACTCCATACCACCTGGTTCGTGCTGGTGG  
ACATCCTGATGGACCTGGGTGCTCTGGCTAGAACTGCGGTAGAGAGTCTAGAGTGGACGTGGCT  
AAGTCCGTGACTTCCGGTCTGGGTTACATGCACTGCTGCCTGAACCCACTGCTGTACGCTTTCGTG  
GGTGTGAAGTTCAGAGAGAGAATGTGGATGTTGCTGCTGCGCCTGGGTTGCCAAATCAGAGAGG  
TCTGCAGAGACAGCCATCCTCTTCTAGAAGAGACTCCTCCTGGTCCGAGACTTCCGTGTTCACTCT  
GGAGGACTTCGTGGGTGACTGGGAGCAGACTGCTGCTTACAACCTGGACCAAGTGTGGAGCAAG  
GTGGTGTGTCCTCCCTGCTGCAGAACCTGGCTGTGTCCGTGACTCCAATTCAGAGAATCGTGAGAT  
CCGGTGAGAACGCTCTGAAGATCGACATCCACGTGATCATCCCATACGAGGGTCTGTCTGCTGATC  
AGATGGCTCAGATCGAAGAGGTGTTCAAGGTGGTGTACCCTGTGGACGACCACCACTTCAAGGTG  
ATCCTGCCATACGGTACTCTGGTGTGACGCGTGTGACTCCAACATGCTGAACTACTTCCGGTAGA  
CCTTACGAGGGTATCGCTGTGTTCCGACGGTAAGAAGATCACTGTGACTGGTACTCTGTGGAACGGT  
AACAAGATCATCGACGAGCGCCTGATCACTCCTGACGGTCCATGCTGTTTCCAGAGTACTATCAAC  
TCCTAA

---

**Bril-CXCR3<sup>KOR</sup> (in pFastBac1)**

---

ATGAAGACTATCATCGCTCTGTCCTACATCTTCTGCCTGGTGTTCGCTGACTACAAGGACGATGAC  
GACAAGGGTTCCGCTGACCTGGAGGACAACCTGGGAGACTCTGAACGACAACCTGAAGGTGATCGA  
GAAGGCTGACAACGCTGCTCAAGTGAAGGACGCTCTGACTAAGATGAGAGCTGCCGCTCTGGACG  
CTCAGAAGGCTACTCCACCAAAGCTGGAGGACAAGTCCCCTGACTCCCCTGAGATGAAGGACTTC  
AGACACGGTTTTCGACATCCTGGTGGGTGAGATCGACGACGCTCTGAAGCTGGCTAACGAGGGTAA  
GGTGAAGGAGGCTCAAGCTGCTGCCGAGCAGTTGAAGACTACTAGAAACGCTTACATTCAGAAGTA  
CCTGCTGGTGCCAAGAGGTTCCATGGTGCTGGAGGTGTCCGACCACCAAGTGTGAACGACGCTG  
AGGTGGCTGCTCTGCTGGAGAACTTCTCCTCTTCTACGACTACGGTGAGAACGAGTCCGACTCCT  
GCTGCACTTCCCCACCATGCCACAAGACTTCTCCTGAACTTCGACAGAGCTTTCTGCCTGCTC  
TGTA CTCCCTGCTGTTCTGCTGGGTCTGCTGGGTAACGGTGTGTGGCTGCTGTGCTGCTGTCTA  
GAAGAACTGCTCTGTCCTCCACTGACACTTTCTGCTGCACCTGGCTGTGGCTGACACTCTGCTGG

---

---

TGCTGACTCTGCCACTGTGGGCTGTGGACGCTGCTGTGCAGTGGGTGTTCCGGTCCGGTCTGTGC  
AAGGTGGCTGGTGCTTTGTTCAACATCAACTTCTACGCTGGTGCTCTGTTGCTGGCTTGCATCTCCT  
TCGACAGATACCTGAACATCGTGCACGCTACTCAGCTGTACAGAAGAGGTCCACCTGCTAGAGTGA  
CTCTGACTTGCCTGGCTGTGTGGGGTCTGTGCCTGCTGTTCCGCTCTGCCTGACTTCATCTTCCTGT  
CCGCTCACCACGACGAGAGACTGAACGCTACTCACTGTCAGTACAACCTCCCACAAGTGGGTCCG  
ACTGCTCTGAGAGTGCTGCAGCTGGTGGCTGGTTTCCTGCTGCCACTGCTGGTGATGGCTTACTG  
CTACGCTCACATCCTGGCTAGACTGAAGTCCGTGAGACTGCTGTCCGGTCTAGAGAGAAGGACA  
GAAACCTGAGAAGAATCACTAGACTGGTGGTTCGTGGTTCGTGGTGGCTTTTGCTCTGTGCTGGACTC  
CATAACCCTGGTTCGTGCTGGTGGACATCCTGATGGACCTGGGTGCTCTGGCTAGAAACTGCGGT  
AGAGAGTCTAGAGTGGACGTGGCTAAGTCCGTGACTTCCGGTCTGGGTACATGCACTGCTGCCT  
GAACCCACTGCTGTACGCTTTTCGTGGGTGTGAAGTTCAGAGAGAGAATGTGGATGTTGCTGCTGC  
GCCTGGGTGCCCAAATCAGAGAGGTCTGCAGAGACAGCCATCCTCTTCTAGAAGAGACTCCTCCT  
GGTCCGAGACTTCCTAA

---

**CXCL11 (in pFaseBac1)**

---

ATGAGTGTGAAGGGCATGGCTATAGCCTTGGCTGTGATATTGTGTGCTACAGTTGTTCAAGGCTTCC  
CCATGTTCAAAGAGGACGCTGTCTTTGCATAGGCCCTGGGGTAAAAGCAGTGAAAGTGGCAGATA  
TTGAGAAAGCCTCCATAATGTACCCAAGTAACAACCTGTGACAAAATAGAAGTGATTATTACCCTGAAA  
GAAAATAAAGGACAACGATGCCTAAATCCCAAATCGAAGCAAGCAAGGCTTATAATCAAAAAAGTTGA  
AAGAAAGAATTTTcaccatcaccatcaccatcaccatcaccatTAG

---

**Supplementary Table 2. Primers for the generation of CXCR3 and its mutants used in cAMP assay.**

| <b>Construct</b> | <b>Vector</b> | <b>Primers</b>                                                                                                        |
|------------------|---------------|-----------------------------------------------------------------------------------------------------------------------|
| CXCR3            | pcDNA3.1      | F: CTGTTCCAGGGGCCCGATCCATGGTGCTGGAGGTGTCCGAC<br>R:<br>GATGGTGATGCTCGAGTCACAAGCCCGAGTAGGAGGCCTCTGAA<br>GTCTCGGACCAGGAG |
| CXCR3-D52A       | pcDNA3.1      | F: GACTTCTCCCTGAACTTCGCTAGAGCTTTCTGCCTGCTC<br>R: GAGCAGGCAGGAAAGCTCTAGCGAAGTTCAGGGAGAAGTC                             |
| CXCR3-Y60A       | pcDNA3.1      | F: GCTTTCCTGCCTGCTCTGGCTTCCCTGCTGTTCTGCTGG<br>R: CCAGCAGGAACAGCAGGGAAGCCAGAGCAGGCAGGAAAGC                             |
| CXCR3-W109A      | pcDNA3.1      | F: GTGCTGACTCTGCCACTGGCTGCTGTGGACGCTGCTGTGC<br>R: GCACAGCAGCGTCCACAGCAGCCAGTGGCAGAGTCAGCAC                            |
| CXCR3-F131A      | pcDNA3.1      | F: GCAAGGTGGCTGGTGGCTTTGGCTAACATCAACTTCTACGCTG<br>R: CAGCGTAGAAGTTGATGTTAGCCAAAGCACCCAGCCACCTTGC                      |
| CXCR3-F135A      | pcDNA3.1      | F: GCTTTGTTCAACATCAACGCTTACGCTGGTGGCTCTGTTGC<br>R: GCAACAGAGCACCCAGCGTAAGCGTTGATGTTGAACAAAGC                          |
| CXCR3-R197A      | pcDNA3.1      | F: TCCGCTCACCACGACGAGGCTCTGAACGCTACTCACTGTC<br>R: GACAGTGAGTAGCGTTCAGAGCCTCGTCGTGGTGAGCGGA                            |
| CXCR3-R212A      | pcDNA3.1      | F: CAACTTCCCACAAGTGGGTGCTACTGCTCTGAGAGTGCTGCAG<br>R: CTGCAGCACTCTCAGAGCAGTAGCACCCACTTGTGGGAAGTTG                      |
| CXCR3-W268A      | pcDNA3.1      | F: GTGGCTTTTGCTCTGTGCGCTACTCCATACCACCTGGTCCG<br>R: CGACCAGGTGGTATGGAGTAGCGCACAGAGCAAAAGCCAC                           |
| CXCR3-Y271A      | pcDNA3.1      | F: GCTCTGTGCTGGACTCCAGCTCACCTGGTCCGTGCTGGTGG<br>R: CCACCAGCACGACCAGGTGAGCTGGAGTCCAGCACAGAGC                           |
| CXCR3-D282A      | pcDNA3.1      | F: CTGGTGGACATCCTGATGGCTCTGGGTGCTCTGGCTAGAA<br>R: TTCTAGCCAGAGCACCCAGAGCCATCAGGATGTCCACCAG                            |
| CXCR3-E293A      | pcDNA3.1      | F: GCTAGAAACTGCGGTAGAGCTTCTAGAGTGGACGTGGCTA<br>R: TAGCCACGTCCACTCTAGAAGCTCTACCGCAGTTTCTAGC                            |
| CXCR3-S304L      | pcDNA3.1      | F: CTAAGTCCGTGACTTTGGGTCTGGGTACATGC<br>R: GCATGTAACCCAGACCCAAAGTCACGGACTTAG                                           |
| CXCR3-G307A      | pcDNA3.1      | F: TCCGTGACTTCCGGTCTGGCTTACATGCACTGCTGCCTGA<br>R: TCAGGCAGCAGTGCATGTAAGCCAGACCGGAAGTCACGGA                            |
| CXCR3-Y308A      | pcDNA3.1      | F: GTGACTTCCGGTCTGGGTGCTATGCACTGCTGCCTGAACC<br>R: GGTTCAAGCAGCAGTGCATAGCACCCAGACCGGAAGTCAC                            |
| CXCR3-A265F      | pcDNA3.1      | F: GTCGTGGTGGCTTTTTTCTGTGCTGGACTC<br>R: GAGTCCAGCACAGAAAAAAGCCACCACGAC                                                |
| CXCR3-V261F      | pcDNA3.1      | F: CTGGTGGTGGTCTTCGTGGCTTTTGCTCTG<br>R: CAGAGCAAAAGCCACGAAGACCACGACCACCAG                                             |
