# Supplementary material for: Structural insights into the activation and inhibition of CXC chemokine receptor 3
Source: PubMed Central journal article supplement (PMC11026165; doi:10.1038/s41594-023-01175-5), 2024-01-04

Extended Data Fig. 1b

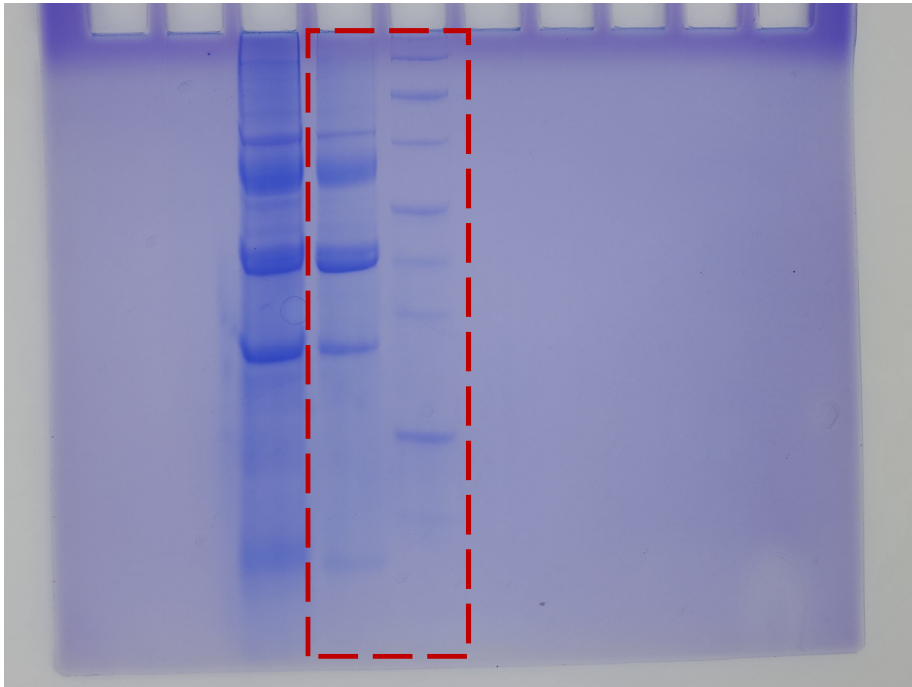

Extended Data Fig. 1e

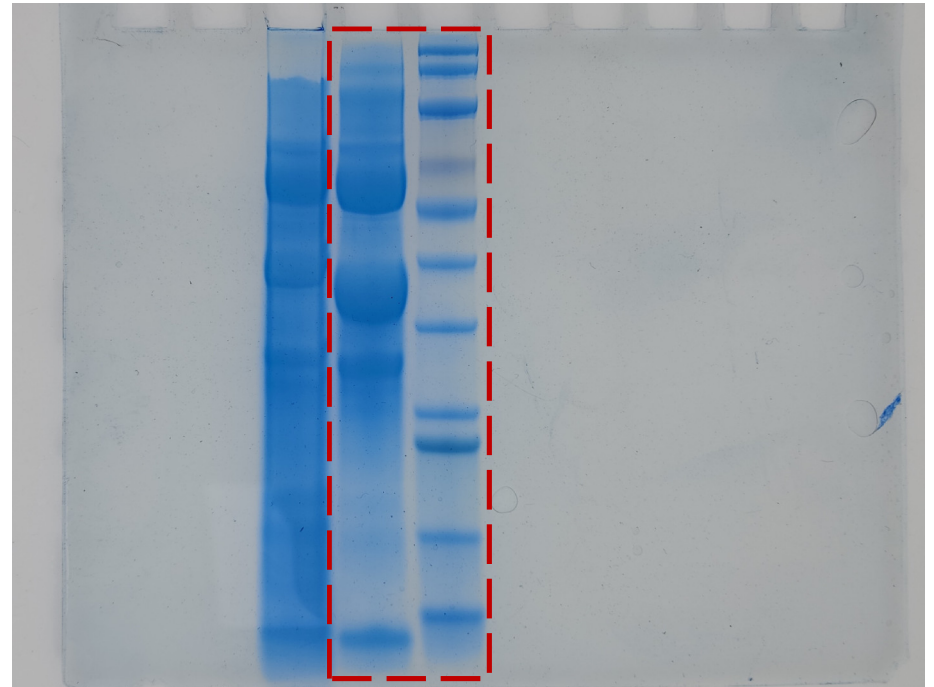

Extended Data Fig. 1h

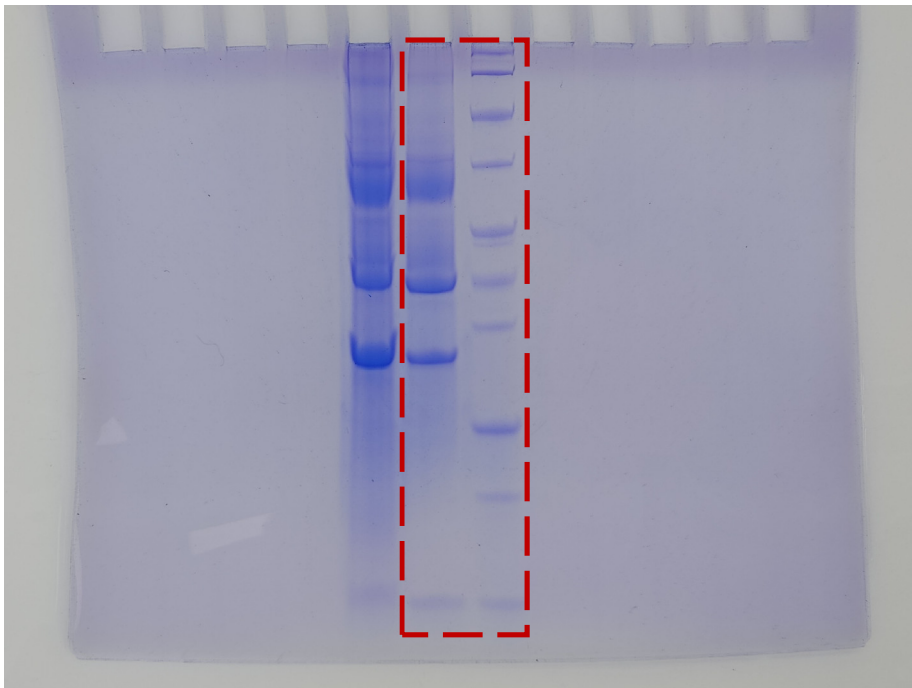

Extended Data Fig. 1k

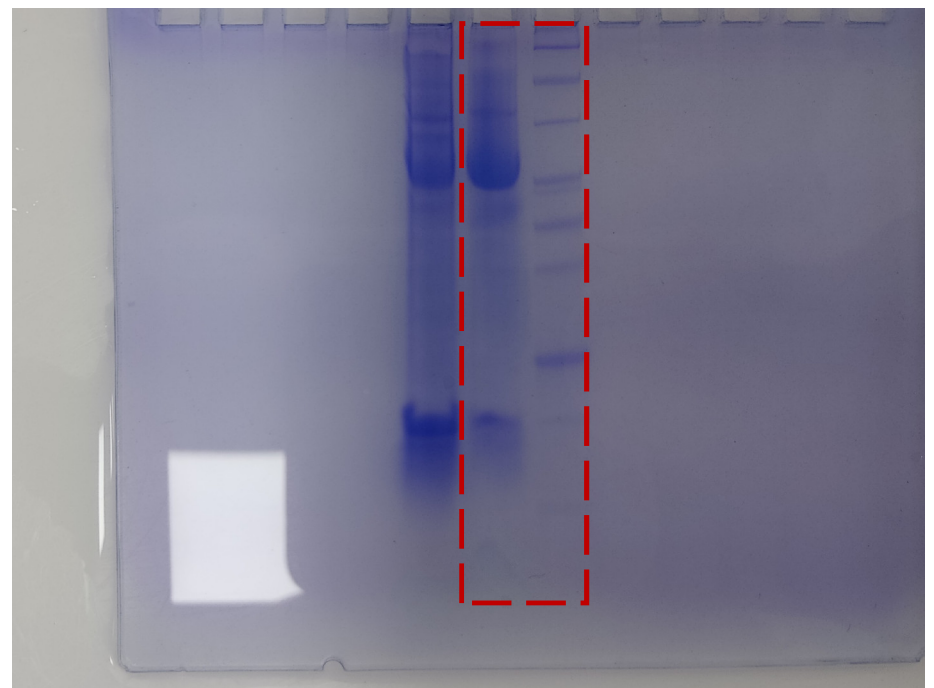

Supplement: 41594_2023_1175_MOESM8_ESM.pdf [file 41594_2023_1175_MOESM8_ESM.pdf]
